# Supplementary material for: Oral and Fecal Microbiome in Molar-Incisor Pattern Periodontitis
Source: Front Cell Infect Microbiol. 2020 Oct 8;10:583761. doi: 10.3389/fcimb.2020.583761 (PMC7578221; doi:10.3389/fcimb.2020.583761)
Supplement: Supplementary file 2 [file Table_2.xlsx]

## Sheet: Online resource 5
Supplementary Table 2. Core microbiome based on species present in the oral microbiome of 50% of the individuals of GC/MIP, Control and shared species. *, higher abundance in patients with GC/MIP compared to Control. #, higher abundance in Control compared do GC/MIP (P < 0.05, nonparametric t test).
GC/MIP	Shared		Control
Acidovorax ebreus	Abiotrophia defectiva	Mycoplasma salivarium	Acidipropionibacterium acidifaciens
Actinomyces cardiffensis	Absconditabacteria_(SR1)_[G-1] bacterium_HMT_345	Neisseria bacilliformis	Aggregatibacter paraphrophilus#
Actinomyces sp._HMT_897	Actinomyces gerencseriae	Neisseria elongata	Bacteroides pyogenes
Butyrivibrio sp._HMT_080	Actinomyces israelii	Neisseria flavescens#	Capnocytophaga sp._HMT_902
Fastidiosipila sanguinis	Actinomyces massiliensis	Neisseria mucosa	Clostridiales_[F-1][G-2] bacterium_HMT_402
Fretibacterium sp._HMT_360	Actinomyces meyeri	Neisseria oralis	Cutibacterium acnes
Neisseriaceae_[G-1] bacterium_HMT_174	Actinomyces naeslundii#	Olsenella sp._HMT_807	Desulfomicrobium orale
Peptostreptococcaceae_[XI][G-1] bacterium_HMT_383	Actinomyces sp._HMT_169#	Olsenella uli	Eggerthella lenta
Prevotella oralis*	Actinomyces sp._HMT_170	Oribacterium sinus	Enterococcus saccharolyticus
Prevotella sp._HMT_306	Actinomyces sp._HMT_414*	Oribacterium sp._HMT_078	Gracilibacteria_(GN02)_[G-1] bacterium_HMT_871#
Prevotella sp._HMT_315*	Actinomyces sp._HMT_448	Parvimonas sp._HMT_110	Haemophilus sp._HMT_908#
Saccharibacteria_(TM7)_[G-4] bacterium_HMT_355	Actinomyces sp._HMT_525*	Peptidiphaga gingivicola	Leptotrichia sp._HMT_463
Scardovia wiggsiae	Actinomyces timonensis	Peptidiphaga sp._HMT_183	Leptotrichia sp._HMT_847
Selenomonas sp._HMT_126	Aggregatibacter actinomycetemcomitans	Peptococcus sp._HMT_167*	Moraxella sp._HMT_276
Streptococcus constellatus	Aggregatibacter aphrophilus#	Peptococcus sp._HMT_168	Ottowia sp._HMT_894
Treponema amylovorum	Aggregatibacter sp._HMT_458	Peptoniphilaceae_[G-1] bacterium_HMT_113	Peptostreptococcaceae_[XI][G-1] sulci
Treponema sp._HMT_238*	Aggregatibacter sp._HMT_512	Peptostreptococcaceae_[XI][G-2] bacterium_HMT_091	Porphyromonas sp._HMT_278
Treponema sp._HMT_239	Aggregatibacter sp._HMT_898	Peptostreptococcaceae_[XI][G-3] bacterium_HMT_495	Prevotella sp._HMT_293
Treponema sp._HMT_242	Aggregatibacter sp._HMT_949	Peptostreptococcaceae_[XI][G-4] bacterium_HMT_369*	Pseudopropionibacterium sp._HMT_194#
Treponema sp._HMT_258	Agrobacterium tumefaciens	Peptostreptococcaceae_[XI][G-7] bacterium_HMT_081	Ruminococcaceae_[G-3] bacterium_HMT_366
Treponema sp._HMT_490	Alloprevotella rava	Porphyromonas catoniae	Streptococcus cristatus_clade_578#
Treponema sp._HMT_508	Alloprevotella sp._HMT_473	Porphyromonas endodontalis*	Tannerella sp._HMT_916
Treponema sp._HMT_518*	Alloprevotella sp._HMT_912	Porphyromonas gingivalis*	Treponema sp._HMT_230
Veillonellaceae_[G-1] bacterium_HMT_150	Alloprevotella sp._HMT_914	Porphyromonas pasteri#
	Alloprevotella tannerae	Porphyromonas sp._HMT_275
	Anaeroglobus geminatus	Porphyromonas sp._HMT_277
	Anaerolineae_[G-1] bacterium_HMT_439	Porphyromonas sp._HMT_284
	Atopobium parvulum	Porphyromonas sp._HMT_285
	Bacillus anthracis	Prevotella baroniae*
	Bacteroidaceae_[G-1] bacterium_HMT_272*	Prevotella buccae
	Bacteroidales_[G-2] bacterium_HMT_274	Prevotella dentalis
	Bacteroides heparinolyticus	Prevotella denticola
	Bacteroides zoogleoformans	Prevotella enoeca
	Bacteroidetes_[G-3] bacterium_HMT_280*	Prevotella fusca*
	Bacteroidetes_[G-3] bacterium_HMT_281	Prevotella histicola
	Bacteroidetes_[G-3] bacterium_HMT_899	Prevotella intermedia
	Bacteroidetes_[G-5] bacterium_HMT_505	Prevotella maculosa
	Bacteroidetes_[G-5] bacterium_HMT_507	Prevotella marshii
	Bacteroidetes_[G-5] bacterium_HMT_511*	Prevotella melaninogenica
	Bacteroidetes_[G-7] bacterium_HMT_911	Prevotella micans
	Bergeyella sp._HMT_206#	Prevotella nanceiensis
	Bergeyella sp._HMT_322	Prevotella nigrescens
	Bergeyella sp._HMT_422	Prevotella oris
	Bergeyella sp._HMT_900#	Prevotella oulorum
	Bergeyella sp._HMT_907	Prevotella pallens
	Bifidobacterium dentium	Prevotella pleuritidis
	Bulleidia extructa	Prevotella saccharolytica
	Burkholderia cepacia	Prevotella salivae
	Butyrivibrio sp._HMT_090	Prevotella scopos
	Campylobacter concisus	Prevotella shahii
	Campylobacter gracilis	Prevotella sp._HMT_292
	Campylobacter showae*	Prevotella sp._HMT_301*
	Campylobacter sp._HMT_044	Prevotella sp._HMT_304*
	Capnocytophaga gingivalis#	Prevotella sp._HMT_309
	Capnocytophaga granulosa#	Prevotella sp._HMT_313
	Capnocytophaga leadbetteri	Prevotella sp._HMT_314
	Capnocytophaga sp._HMT_323	Prevotella sp._HMT_317
	Capnocytophaga sp._HMT_324#	Prevotella sp._HMT_376
	Capnocytophaga sp._HMT_326	Prevotella sp._HMT_396
	Capnocytophaga sp._HMT_332	Prevotella sp._HMT_443
	Capnocytophaga sp._HMT_336	Prevotella sp._HMT_472
	Capnocytophaga sp._HMT_338	Prevotella sp._HMT_526
	Capnocytophaga sp._HMT_412	Prevotella veroralis
	Capnocytophaga sp._HMT_863	Pseudomonas stutzeri
	Capnocytophaga sp._HMT_864	Pseudopropionibacterium propionicum
	Capnocytophaga sputigena	Pyramidobacter piscolens
	Cardiobacterium hominis	Rothia aeria
	Cardiobacterium valvarum	Rothia dentocariosa#
	Catonella sp._HMT_164	Rothia mucilaginosa#
	Catonella sp._HMT_451	Ruminococcaceae_[G-1] bacterium_HMT_075
	Clostridiales_[F-1][G-1] bacterium_HMT_093	Ruminococcaceae_[G-2] bacterium_HMT_085
	Corynebacterium durum	Ruminococcaceae_[G-3] bacterium_HMT_381
	Corynebacterium matruchotii	Saccharibacteria_(TM7)_[G-1] bacterium_HMT_346
	Desulfobulbus sp._HMT_041*	Saccharibacteria_(TM7)_[G-1] bacterium_HMT_347#
	Desulfovibrio fairfieldensis	Saccharibacteria_(TM7)_[G-1] bacterium_HMT_348
	Dialister invisus	Saccharibacteria_(TM7)_[G-1] bacterium_HMT_349
	Dialister pneumosintes	Saccharibacteria_(TM7)_[G-1] bacterium_HMT_352
	Dialister sp._HMT_119	Saccharibacteria_(TM7)_[G-1] bacterium_HMT_488
	Eggerthia catenaformis	Saccharibacteria_(TM7)_[G-1] bacterium_HMT_952
	Eikenella corrodens	Saccharibacteria_(TM7)_[G-2] bacterium_HMT_350
	Enterococcus italicus#	Saccharibacteria_(TM7)_[G-3] bacterium_HMT_351
	Erysipelotrichaceae_[G-1] bacterium_HMT_905	Saccharibacteria_(TM7)_[G-5] bacterium_HMT_356
	Escherichia coli	Saccharibacteria_(TM7)_[G-6] bacterium_HMT_870#
	Eubacterium brachy	Saccharibacteria_(TM7)_[G-8] bacterium_HMT_955
	Eubacterium infirmum	Schlegelella thermodepolymerans
	Eubacterium nodatum*	Selenomonas artemidis
	Eubacterium saphenum*	Selenomonas dianae
	Eubacterium yurii_subspp._yurii_&_margaretiae	Selenomonas flueggei
	Filifactor alocis*	Selenomonas infelix*
	Fretibacterium fastidiosum*	Selenomonas noxia
	Fretibacterium sp._HMT_359*	Selenomonas sp._HMT_134*
	Fusobacterium naviforme	Selenomonas sp._HMT_136
	Fusobacterium nucleatum_subsp._polymorphum	Selenomonas sp._HMT_137
	Fusobacterium nucleatum_subsp._vincentii	Selenomonas sp._HMT_442
	Fusobacterium periodonticum	Selenomonas sp._HMT_501
	Fusobacterium sp._HMT_248	Selenomonas sp._HMT_892
	Fusobacterium sp._HMT_370	Selenomonas sp._HMT_936
	Gemella haemolysans#	Selenomonas sp._HMT_937
	Gemella morbillorum#	Selenomonas sputigena*
	Gemella sanguinis	Shuttleworthia satelles
	Gemella sp._HMT_928	Slackia exigua
	Gracilibacteria_(GN02)_[G-1] bacterium_HMT_872	Sneathia sanguinegens*
	Granulicatella adiacens	Solobacterium moorei*
	Granulicatella elegans#	Staphylococcus epidermidis
	Haemophilus parahaemolyticus	Stomatobaculum longum
	Haemophilus parainfluenzae#	Stomatobaculum sp._HMT_097#
	Haemophilus sp._HMT_036#	Stomatobaculum sp._HMT_373
	Johnsonella ignava	Streptococcus anginosus
	Johnsonella sp._HMT_166	Streptococcus gordonii
	Kingella denitrificans#	Streptococcus intermedius
	Kingella oralis#	Streptococcus mutans
	Kingella sp._HMT_012#	Streptococcus oralis_subsp._tigurinus_clade_071#
	Klebsiella pneumoniae	Streptococcus sanguinis
	Lachnoanaerobaculum saburreum	Streptococcus sinensis
	Lachnoanaerobaculum sp._HMT_083	Streptococcus sp._HMT_056#
	Lachnoanaerobaculum sp._HMT_089	Streptococcus vestibularis
	Lachnoanaerobaculum umeaense	Tannerella forsythia
	Lachnospiraceae_[G-10] bacterium_HMT_094	Tannerella sp._HMT_286
	Lachnospiraceae_[G-2] bacterium_HMT_088	Tannerella sp._HMT_808
	Lachnospiraceae_[G-2] bacterium_HMT_096	Treponema denticola
	Lachnospiraceae_[G-3] bacterium_HMT_100	Treponema lecithinolyticum
	Lachnospiraceae_[G-7] bacterium_HMT_086	Treponema maltophilum
	Lachnospiraceae_[G-8] bacterium_HMT_500*	Treponema pectinovorum
	Lactobacillus pentosus	Treponema socranskii*
	Lautropia mirabilis#	Treponema sp._HMT_226
	Leptotrichia buccalis	Treponema sp._HMT_231*
	Leptotrichia goodfellowii#	Treponema sp._HMT_234
	Leptotrichia hofstadii	Treponema sp._HMT_236*
	Leptotrichia hongkongensis	Treponema sp._HMT_237
	Leptotrichia shahii	Treponema sp._HMT_247
	Leptotrichia sp._HMT_212	Treponema sp._HMT_251
	Leptotrichia sp._HMT_219	Treponema sp._HMT_254
	Leptotrichia sp._HMT_221	Treponema sp._HMT_257
	Leptotrichia sp._HMT_223	Treponema sp._HMT_262
	Leptotrichia sp._HMT_225	Treponema sp._HMT_927
	Leptotrichia sp._HMT_417	Veillonella atypica
	Leptotrichia sp._HMT_498	Veillonella denticariosi
	Leptotrichia sp._HMT_909	Veillonella dispar
	Leptotrichia wadei	Veillonella parvula
	Megasphaera micronuciformis	Veillonella rogosae
	Megasphaera sp._HMT_841	Veillonella sp._HMT_780
	Mitsuokella multacida	Veillonellaceae_[G-1] bacterium_HMT_129
	Mitsuokella sp._HMT_131	Veillonellaceae_[G-1] bacterium_HMT_132
	Mogibacterium neglectum	Veillonellaceae_[G-1] bacterium_HMT_135*
	Mogibacterium timidum	Veillonellaceae_[G-1] bacterium_HMT_145*
	Mycoplasma faucium
